# Supplementary material for: Tuning luminescence from NIR-I to NIR-II in Cr3+-doped olivine phosphors for nondestructive analysis
Source: Royal Society of Chemistry journal article supplement (doi:10.1039/d1tc00521a), 2021-01-01
Supplement: d1tc00521a1.pdf [file d1tc00521a1.pdf]

## SUPPORTING INFORMATION

### Tuning Luminescence from NIR-I to NIR-II in Cr<sup>3+</sup>-doped Olivine Phosphors for Nondestructive Analysis

Hao Cai, Shengqiang Liu, Zhen Song\*, Quanlin Liu\*

The Beijing Municipal Key Laboratory of New Energy Materials and Technologies,  
School of Materials Science & Engineering, University of Science and Technology  
Beijing, Beijing 100083, China.

\* Corresponding Author: E-mail address: ql Liu@ustb.edu.cn (Quanlin Liu)

\* Corresponding Author: E-mail address: zsong@ustb.edu.cn (Zhen Song)

**Table S1.** The refined structural parameters of Mg<sub>2</sub>GeO<sub>4</sub>:1% Cr<sup>3+</sup>.

| Space group         |      | Pnma                                                                                                | Symmetry |          |       | orthorhombic |
|---------------------|------|-----------------------------------------------------------------------------------------------------|----------|----------|-------|--------------|
| Cell parameters     |      | a = 10.3049 Å, b = 6.0261 Å, c = 4.9097 Å, V = 304.887 Å <sup>3</sup>                               |          |          |       |              |
| Reliability factors |      | R <sub>p</sub> = 8.47 %, R <sub>wp</sub> = 14.0 %, R <sub>exp</sub> = 8.83 %, χ <sup>2</sup> = 2.50 |          |          |       |              |
| Atom                | Site | x                                                                                                   | y        | z        | Occ.  |              |
| Mg1                 | 4a   | 0.000(0)                                                                                            | 0.000(0) | 0.000(0) | 1.000 |              |
| Mg2                 | 4c   | 0.275(5)                                                                                            | 0.250(0) | 0.992(9) | 1.000 |              |
| Ge                  | 4c   | 0.094(7)                                                                                            | 0.250(0) | 0.436(2) | 1.000 |              |
| O1                  | 4c   | 0.093(5)                                                                                            | 0.250(0) | 0.789(3) | 1.000 |              |
| O2                  | 4c   | 0.438(2)                                                                                            | 0.250(0) | 0.230(2) | 1.000 |              |
| O3                  | 8d   | 0.164(7)                                                                                            | 0.020(9) | 0.268(5) | 1.000 |              |

**Table S2.** The refined structural parameters of LiScGeO<sub>4</sub>:1% Cr<sup>3+</sup>.

| Space group         |      | Pnma                                                                                                 | Symmetry |          |       | orthorhombic |
|---------------------|------|------------------------------------------------------------------------------------------------------|----------|----------|-------|--------------|
| Cell parameters     |      | a = 10.6662 Å, b = 5.9874 Å, c = 4.9674 Å, V = 317.235 Å <sup>3</sup>                                |          |          |       |              |
| Reliability factors |      | R <sub>p</sub> = 12.9 %, R <sub>wp</sub> = 18.6 %, R <sub>exp</sub> = 11.17 %, χ <sup>2</sup> = 2.77 |          |          |       |              |
| Atom                | Site | x                                                                                                    | y        | z        | Occ.  |              |
| Li                  | 4a   | 0.000(0)                                                                                             | 0.000(0) | 0.000(0) | 1.000 |              |
| Sc                  | 4c   | 0.269(9)                                                                                             | 0.250(0) | 0.002(5) | 1.000 |              |
| Ge                  | 4c   | 0.090(7)                                                                                             | 0.250(0) | 0.448(5) | 1.000 |              |
| O1                  | 4c   | 0.097(8)                                                                                             | 0.250(0) | 0.801(8) | 1.000 |              |
| O2                  | 4c   | 0.441(5)                                                                                             | 0.250(0) | 0.197(8) | 1.000 |              |
| O3                  | 8d   | 0.170(2)                                                                                             | 0.033(5) | 0.285(1) | 1.000 |              |

**Table S3.** Detailed bond length information of Mg<sub>2</sub>GeO<sub>4</sub> (ICSD-41415).

|        | Bond length (Å) | Average (Å) |        | Bond length (Å) | Average (Å) |       | Bond length (Å) | Average (Å) |
|--------|-----------------|-------------|--------|-----------------|-------------|-------|-----------------|-------------|
| Mg1-O1 | 2.053           |             | Mg2-O1 | 2.16            |             | Ge-O1 | 1.74            |             |
| Mg1-O1 | 2.053           |             | Mg2-O2 | 2.08            |             |       |                 |             |
| Mg1-O2 | 2.08            |             | Mg2-O3 | 2.05            |             | Ge-O2 | 1.77            |             |
|        |                 | 2.094       |        |                 | 2.150       |       |                 | 1.742       |
| Mg1-O2 | 2.08            |             | Mg2-O3 | 2.05            |             | Ge-O3 | 1.73            |             |
| Mg1-O3 | 2.15            |             | Mg2-O3 | 2.29            |             |       |                 |             |
| Mg1-O3 | 2.15            |             | Mg2-O3 | 2.29            |             | Ge-O3 | 1.73            |             |

**Table S4.** Detailed bond length information of LiScGeO<sub>4</sub> (ICSD-62481).

|       | Bond length (Å) | Average (Å) | Bond length (Å) | Average (Å) | Bond length (Å) | Average (Å) |
|-------|-----------------|-------------|-----------------|-------------|-----------------|-------------|
| Li-O1 | 2.086           |             | Sc-O1           | 2.125       | Ge-O1           | 1.732       |
| Li-O1 | 2.086           |             | Sc-O2           | 2.069       |                 |             |
| Li-O2 | 2.204           |             | Sc-O3           | 2.08        | Ge-O2           | 1.734       |
|       |                 | 2.209       |                 | 2.124       |                 | 1.756       |
| Li-O2 | 2.204           |             | Sc-O3           | 2.08        | Ge-O3           | 1.779       |
| Li-O3 | 2.337           |             | Sc-O3           | 2.196       |                 |             |
| Li-O3 | 2.337           |             | Sc-O3           | 2.196       | Ge-O3           | 1.779       |

**Table S5.** The FWHM information of 600-1000 nm band in excitation spectra.

| x   | $\lambda_{I-0.5(\text{left})}$ (nm) | $\lambda_{I-0.5(\text{right})}$ (nm) | $\Delta E$ (eV) |
|-----|-------------------------------------|--------------------------------------|-----------------|
| 0   | 578                                 | 756                                  | 0.51            |
| 0.1 | 584                                 | 766                                  | 0.50            |
| 0.2 | 588                                 | 774                                  | 0.51            |
| 0.3 | 593                                 | 785                                  | 0.51            |
| 0.4 | 599                                 | 794                                  | 0.51            |
| 0.5 | 602                                 | 803                                  | 0.52            |
| 0.6 | 607                                 | 811                                  | 0.51            |
| 0.7 | 611                                 | 814                                  | 0.51            |
| 0.8 | 622                                 | 832                                  | 0.50            |
| 0.9 | 625                                 | 848                                  | 0.52            |
| 1.0 | 634                                 | 858                                  | 0.51            |

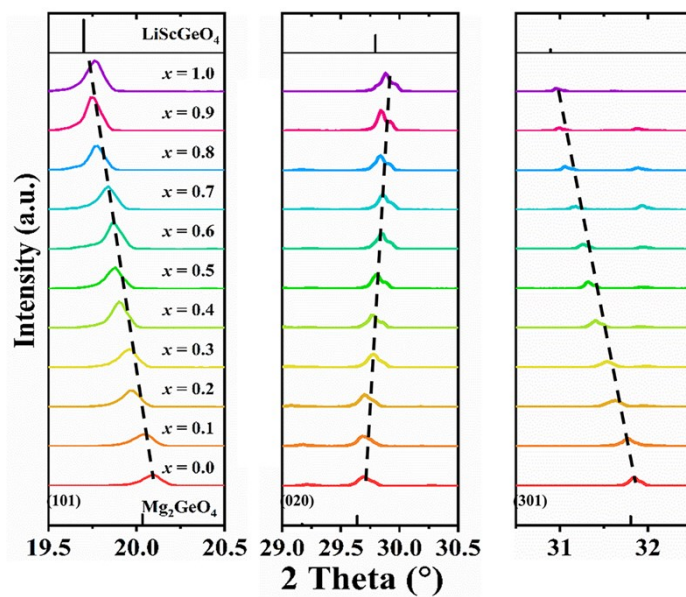

Fig. S1. 2 theta value of (101), (020) and (301) planes with the x value changing from 0 to 1.

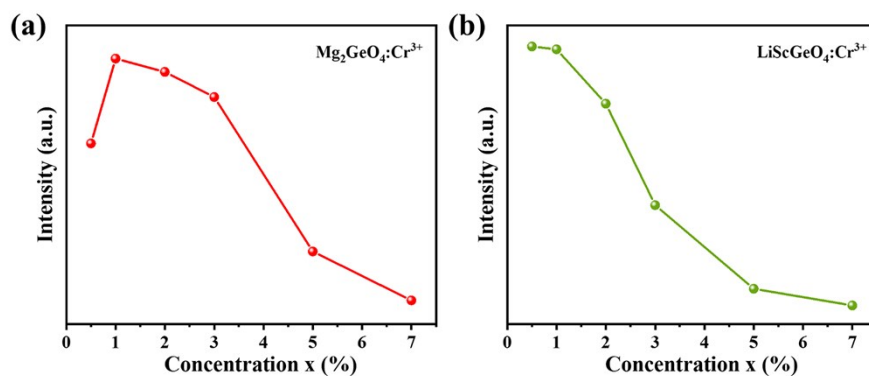

Fig. S2. The concentration dependent experiment of  $\text{Mg}_2\text{GeO}_4$  and  $\text{LiScGeO}_4$  ( $\lambda_{\text{ex}} = 465 \text{ nm}$ ).

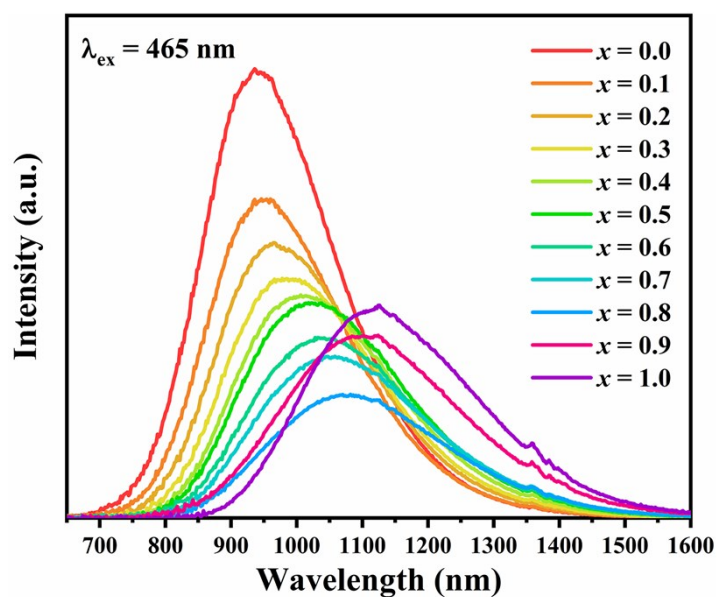

Fig. S3. PL spectra of  $(\text{Mg}_{1-x}\text{Li}_x)(\text{Mg}_{1-x}\text{Sc}_x)\text{GeO}_4:1\%\text{Cr}^{3+}$  with different compositions.

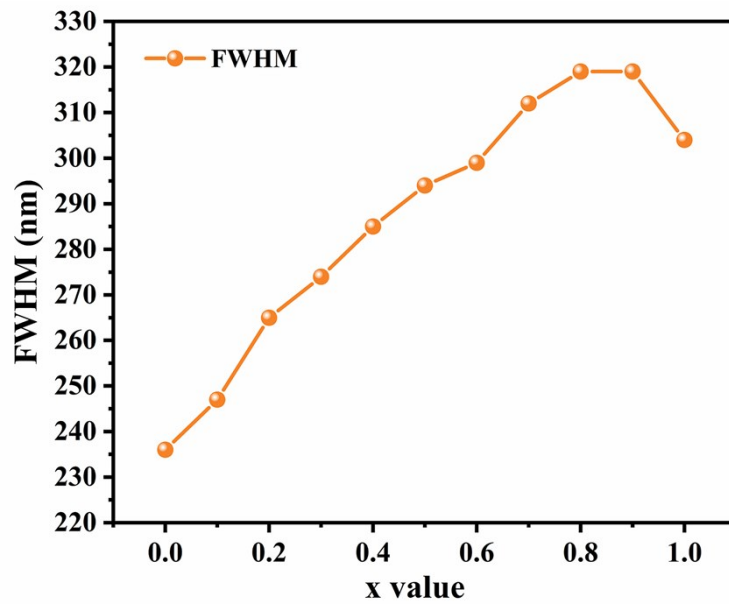

Fig. S4. FWHM of  $(\text{Mg}_{1-x}\text{Li}_x)(\text{Mg}_{1-x}\text{Sc}_x)\text{GeO}_4:1\%\text{Cr}^{3+}$  with different compositions.

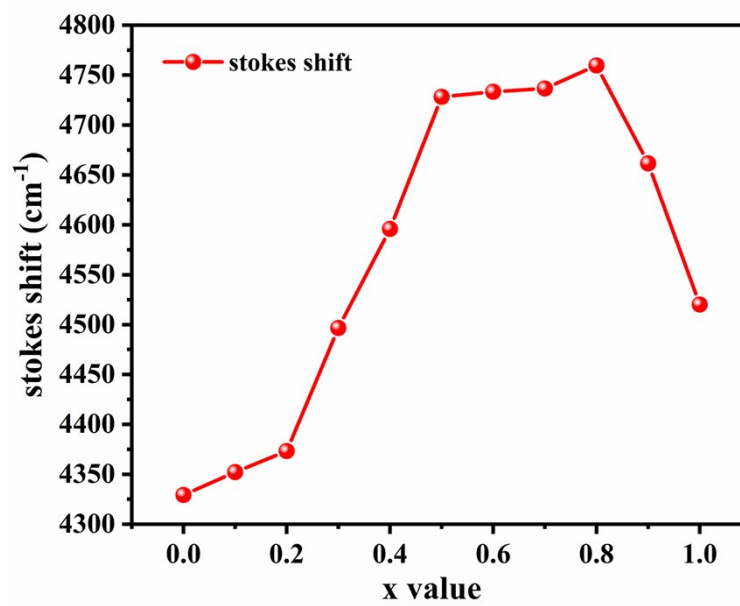

Fig. S5. Stokes shift of  $(\text{Mg}_{1-x}\text{Li}_x)(\text{Mg}_{1-x}\text{Sc}_x)\text{GeO}_4:1\%\text{Cr}^{3+}$  with different compositions.

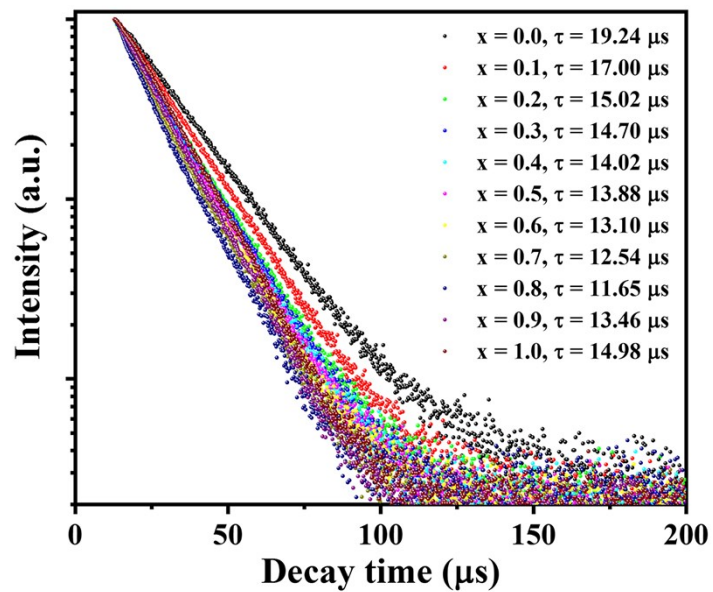

**Fig. S6.** Lifetimes of series of  $(\text{Mg}_{1-x}\text{Li}_x)(\text{Mg}_{1-x}\text{Sc}_x)\text{GeO}_4:1\% \text{Cr}^{3+}$  phosphors (Monitored under their optimal excitation and emission wavelength).
